# Supplementary material
Source: PubMed Central journal article supplement (PMC4266696)
Supplement: NIHMS615280-supplement-appendix_table.pdf [file NIHMS615280-supplement-appendix_table.pdf]

**Appendix. Selected Community Child Health Variables, Data Sources, Questions and Operational Definitions**

| Variable Name                                                                                              | Data Source             | Survey Question                                                                                                                                                                                                                                                                                                                                                                                                                                                                        | Operational Definition                                                                                                                                                                               |
|------------------------------------------------------------------------------------------------------------|-------------------------|----------------------------------------------------------------------------------------------------------------------------------------------------------------------------------------------------------------------------------------------------------------------------------------------------------------------------------------------------------------------------------------------------------------------------------------------------------------------------------------|------------------------------------------------------------------------------------------------------------------------------------------------------------------------------------------------------|
| <b>OUTCOME VARIABLE</b>                                                                                    |                         |                                                                                                                                                                                                                                                                                                                                                                                                                                                                                        |                                                                                                                                                                                                      |
| Anticipated future involvement in 1 or more of 8 community settings 10 years after completion of residency | Resident Exit Survey    | In relation to your anticipated career/position 10 years from now, please estimate your future involvement in the following community activities related to child health. (1= not at all; 2 = limited; 3 = moderate 4= substantial)<br><br>8 settings listed—School, Day Care Center, Head Start Program, Juvenile Justice Detention Program, Shelter, Camp for Children with Special Needs, Community Health Center, Local or State Health Department                                 | Dichotomous variable: 0 = low (not at all/limited) anticipated involvement in 1 or more community settings; 1 = high (moderate/substantial) anticipated involvement in 1 or more community settings. |
| <b>INDEPENDENT VARIABLES</b>                                                                               |                         |                                                                                                                                                                                                                                                                                                                                                                                                                                                                                        |                                                                                                                                                                                                      |
| Anticipated future involvement in 1 or more of 8 community settings 10 years from start of residency       | Initial Resident Survey | In relation to your anticipated career/position 10 years from now, please estimate your future involvement in the following community activities related to child health. (1= not at all; 2 = limited; 3 = moderate 4= substantial)<br><br>8 settings listed—School, Day Care Center, Head Start Program, Juvenile Justice Detention Program, Shelter, Camp for Children with Special Needs, Community Health Center, Local or State Health Department                                 | Dichotomous variable: 0 = low (not at all/limited) anticipated involvement in 1 or more community settings; 1 = high (moderate/substantial) anticipated involvement in 1 or more community settings. |
| <b>High perceived importance at start of residency</b>                                                     |                         |                                                                                                                                                                                                                                                                                                                                                                                                                                                                                        |                                                                                                                                                                                                      |
| In $\geq$ 1 setting                                                                                        | Initial Resident Survey | Please indicate your perceived importance of each activity from the time you started medical school to the start of your residency program. (1 = none; 2 = limited; 3 = moderate; 4 = very)<br><br>11 settings listed—School, Day Care Center, Head Start Program, Juvenile Justice Detention Program, Shelter, Camp for Children with Special Needs, Community Health Center, Local or State Health Department, Home Visiting, Indian Health Service, International Health Experience | Dichotomous variable: 0 = low (none/limited/moderate); 1 = high (very) perceived importance                                                                                                          |
| Committee member for a medical school, local or national                                                   | Initial Resident Survey | Please indicate your perceived importance in being a committee member for a medical school, local or national organization from the time you started medical school to the start of your residency program. (1 = none; 2 = limited;                                                                                                                                                                                                                                                    |                                                                                                                                                                                                      |

|                                                                                           |                          |                                                                                                                                                                                                                                                                                                                                                                                                                                                                                                     |                                                         |
|-------------------------------------------------------------------------------------------|--------------------------|-----------------------------------------------------------------------------------------------------------------------------------------------------------------------------------------------------------------------------------------------------------------------------------------------------------------------------------------------------------------------------------------------------------------------------------------------------------------------------------------------------|---------------------------------------------------------|
| organization                                                                              |                          | 3 = moderate; 4 = very)                                                                                                                                                                                                                                                                                                                                                                                                                                                                             |                                                         |
| Community-based Research                                                                  | Initial Resident Survey  | Please indicate your perceived importance in community-based research from the time you started medical school to the start of your residency program. (1 = none; 2 = limited; 3 = moderate; 4 = very)                                                                                                                                                                                                                                                                                              |                                                         |
| Longitudinal community-based project                                                      | Initial Resident Survey  | Please indicate your perceived importance in longitudinal community-based projects from the time you started medical school to the start of your residency program. (1 = none; 2 = limited; 3 = moderate; 4 = very)                                                                                                                                                                                                                                                                                 |                                                         |
| Advocacy related to child health                                                          | Initial Resident Survey  | Please indicate your perceived importance in advocacy related to child health from the time you started medical school to the start of your residency program. (1 = none; 2 = limited; 3 = moderate; 4 = very)                                                                                                                                                                                                                                                                                      |                                                         |
| <b>&gt; 30 Days of participation from medical school until the beginning of residency</b> |                          |                                                                                                                                                                                                                                                                                                                                                                                                                                                                                                     |                                                         |
| In $\geq$ 1 setting                                                                       | Initial Resident Survey  | Please indicate the extent of your participation in each activity from the time you started medical school to the start of your residency program. (1 = none; 2 = 1-7 days; 3 = 8-30 days; 4 = 30+ days)<br><br>11 settings listed—School, Day Care Center, Head Start Program, Juvenile Justice Detention Program, Shelter, Camp for Children with Special Needs, Community Health Center, Local or State Health Department, Home Visiting, Indian Health Service, International Health Experience | Dichotomous variable: 0 = $\leq$ 30 days; 1 = >30 days. |
| Committee member for a medical school, local or national organization                     | Initial Resident Survey  | Please indicate the extent of your participation as a committee member for a medical school, local or national organization from the time you started medical school to the start of your residency program. (1 = none; 2 = 1-7 days; 3 = 8-30 days; 4 = 30+ days)                                                                                                                                                                                                                                  |                                                         |
| Community-based research                                                                  | Initial Resident Survey. | Please indicate the extent of your participation in community based research from the time you started medical school to the start of your residency program. (1 = none; 2 = 1-7 days; 3 = 8-30 days; 4 = 30+ days)                                                                                                                                                                                                                                                                                 |                                                         |
| Longitudinal community-based project                                                      | Initial Resident Survey. | Please indicate the extent of your participation in longitudinal community-based projects from the time you started medical school to the start of your residency program. (1 = none; 2 = 1-7 days; 3 = 8-30 days; 4 = 30+ days)                                                                                                                                                                                                                                                                    |                                                         |
| Advocacy related to child health                                                          | Initial Resident Survey  | Please indicate the extent of your participation in advocacy related to child health from the time you started medical school to the start of your residency program. (1 = none; 2 = 1-7 days; 3 = 8-30 days; 4 = 30+ days)                                                                                                                                                                                                                                                                         |                                                         |
| Tutoring/mentoring individuals                                                            | Initial Resident Survey  | Please indicate the extent of your participation in tutoring/mentoring individuals from the time you started medical school to the start of your residency program. (1 = none; 2 = 1-7 days; 3 = 8-30 days; 4 = 30+ days)                                                                                                                                                                                                                                                                           |                                                         |
| <b>Exposures during residency</b>                                                         |                          |                                                                                                                                                                                                                                                                                                                                                                                                                                                                                                     |                                                         |

|                                                                       |                        |                                                                                                                                                                                                                                                                                                                                                                                                                                               |                                                                                                                                                                                                                                    |
|-----------------------------------------------------------------------|------------------------|-----------------------------------------------------------------------------------------------------------------------------------------------------------------------------------------------------------------------------------------------------------------------------------------------------------------------------------------------------------------------------------------------------------------------------------------------|------------------------------------------------------------------------------------------------------------------------------------------------------------------------------------------------------------------------------------|
| In $\geq$ 1 setting                                                   | Annual Resident Survey | Please indicate the extent of your participation in each activity within the past 12 months. (1 = none; 2 = 1-7 days; 3 = 8-30 days; 4 = 30+ days)<br><br>11 settings listed—School, Day Care Center, Head Start Program, Juvenile Justice Detention Program, Shelter, Camp for Children with Special Needs, Community Health Center, Local or State Health Department, Home Visiting, Indian Health Service, International Health Experience | For each year of training, a dichotomous variable was created: 0 = 0 – 7 days in each setting; 1 = $\geq$ 8 days in at least one setting. The three annual values were summed for a final ordinal measure (0- 3) of participation. |
| Grand rounds related to community                                     | Annual Resident Survey | Please indicate the extent of your participation in grand rounds related to community within the past 12 months. (1 = none; 2 = 1-7 days; 3 = 8-30 days; 4 = 30+ days)                                                                                                                                                                                                                                                                        |                                                                                                                                                                                                                                    |
| Other lectures/seminars focused on community                          | Annual Resident Survey | Please indicate the extent of your participation in other lectures/seminars focused on community within the past 12 months. (1 = none; 2 = 1-7 days; 3 = 8-30 days; 4 = 30+ days)                                                                                                                                                                                                                                                             |                                                                                                                                                                                                                                    |
| Committee member for a medical school, local or national organization | Annual Resident Survey | Please indicate the extent of your participation as a committee member for a medical school, local or national organization within the past 12 months. (1 = none; 2 = 1-7 days; 3 = 8-30 days; 4 = 30+ days)                                                                                                                                                                                                                                  |                                                                                                                                                                                                                                    |
| Community-based research                                              | Annual Resident Survey | Please indicate the extent of your participation community based research within the past 12 months. (1 = none; 2 = 1-7 days; 3 = 8-30 days; 4 = 30+ days)                                                                                                                                                                                                                                                                                    |                                                                                                                                                                                                                                    |
| Longitudinal community-based project                                  | Annual Resident Survey | Please indicate the extent of your participation in longitudinal community-based projects within the past 12 months. (1 = none; 2 = 1-7 days; 3 = 8-30 days; 4 = 30+ days)                                                                                                                                                                                                                                                                    |                                                                                                                                                                                                                                    |
| Advocacy related to child health                                      | Annual Resident Survey | Please indicate the extent of your participation in advocacy related to child health within the past 12 months. (1 = none; 2 = 1-7 days; 3 = 8-30 days; 4 = 30+ days)                                                                                                                                                                                                                                                                         |                                                                                                                                                                                                                                    |
